# Supplementary material for: Melatonin Suppresses Oral Squamous Cell Carcinomas Migration and Invasion through Blocking FGF19/FGFR 4 Signaling Pathway
Source: MDPI journal article supplement (doi:10.3390/ijms22189907), 2021-09-14
Supplement: s1 [file s1]

# Supplementary Materials:

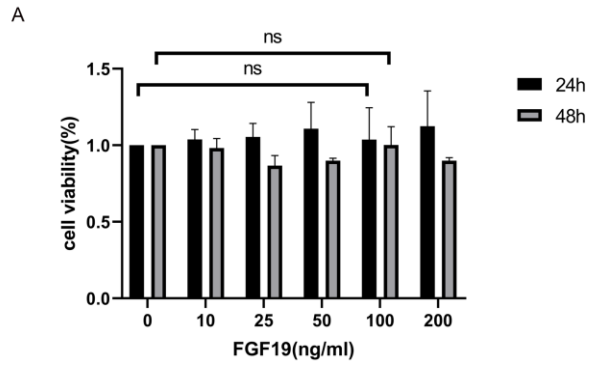

**Figure S1.** Effects of hFGF19 on SCC-15 cells. SCC-15 cells were treated with different concentration of hFGF19 (0, 10, 25, 50, 100, 200 ng/ml) for 24 h and 48 h. (A): Cell viability tested by CCK-8.

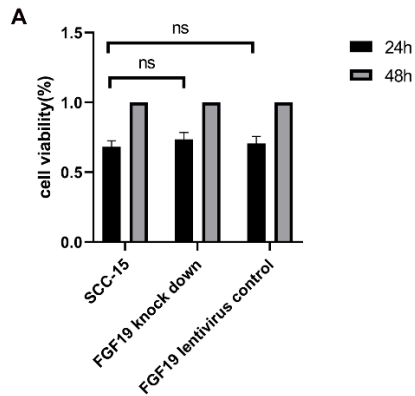

**Figure S2.** Cell viability of SCC-15 cells transfected with sh-NC-Vector and sh-FGF19-vector. SCC-15 cells, SCC-15 cells transfected with sh-NC-Vector and sh-FGF19-vector were incubated for 24 h and 48 h. (A): Cell viability tested by CCK-8.
